# Supplementary material for: Sugar and mineral enriched fraction from olive mill wastewater for promising cosmeceutical application: characterization,in vitroandin vivostudies
Source: Royal Society of Chemistry journal article supplement (doi:10.1039/c7fo01363a), 2017-01-01
Supplement: c7fo01363a1.pdf [file c7fo01363a1.pdf]

**Electronic Supplementary Information**

**Sugars and minerals enriched fraction from olive mill wastewater for promising cosmeceutical application: characterization, *in vitro* and *in vivo* studies.**

**Maria Domenica Di Mauro<sup>a</sup>, Barbara Tomasello<sup>a\*</sup>, Roberta Carla Giardina<sup>a</sup>, Sandro Dattilo<sup>b</sup>,  
Veronica Mazzei<sup>c</sup>, Fulvia Sinatra<sup>d</sup>, Massimo Caruso<sup>e</sup>, Nicola D'Antona<sup>f</sup>, Marcella Renis<sup>a</sup>**

*<sup>a</sup>Department of Drug Sciences, Biochemistry Section, University of Catania, Viale Andrea Doria 6,  
95125 Catania, Italy*

*<sup>b</sup>National Research Council of Italy, Institute of Polymers, Composites and Biomaterials (CNR-  
IPCB), Via Paolo Gaifami 18, 95126 Catania, Italy*

*<sup>c</sup>Department of Biological, Geological and Environmental Science, University of Catania, Corso  
Italia 57, 95129 Catania, Italy*

*<sup>d</sup>Department of Biomedical and Biotechnological Sciences, University of Catania, Via Santa Sofia  
87, 95125 Catania, Italy*

*<sup>e</sup>Department of Clinical and Experimental Medicine, University of Catania, Via Santa Sofia 58,  
95125 Catania, Italy*

*<sup>f</sup>National Research Council of Italy, Institute of Biomolecular Chemistry (CNR-ICB), Via Paolo  
Gaifami 18, 95126 Catania, Italy*

*\*Corrisponding Author: Barbara Tomasello, PhD*

*Department of Drug Sciences, Biochemistry Section, University of Catania, Viale Andrea Doria 6,  
95125 Catania, Italy*

*Email: btomase@unict.it*

*Phone: +39 0957384061*

*Fax: +39 0957384220*

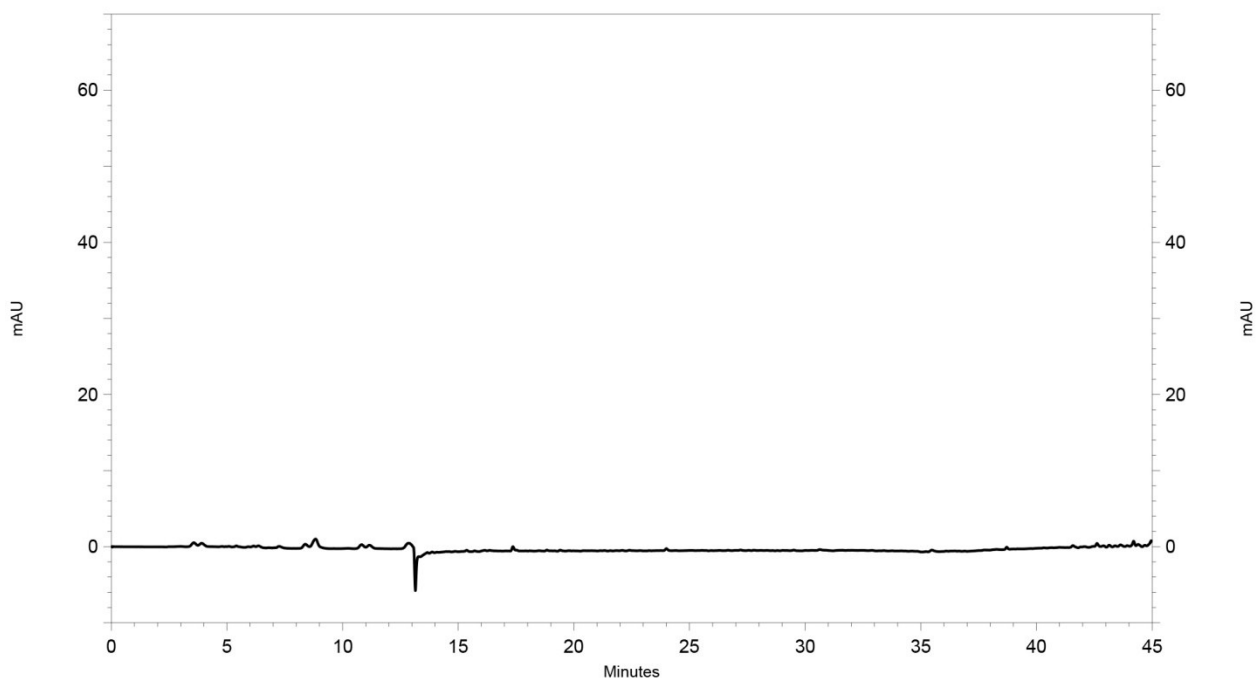

**Fig. S1.** Chromatogram of lyophilized sugars and minerals enriched fraction at 280 nm. HPLC-DAD analysis was performed using a Kinetex C-18 (4.6x250mm, 5 $\mu$ m) column (Phenomenex) with a security guard cartridge (Phenomenex) maintained at 30 $\pm$ 1 $^{\circ}$ C. The sample (about 0.1g), previously dissolved in water (10 ml), filtered through 0.45  $\mu$ m regenerated cellulose syringe filter and diluted both 1:10 and 1:20, was eluted with acetonitrile (A) and water (B) both added with 0.1% trifluoroacetic acid, with the following gradient: 100% B as initial condition, maintained for 5min; 58% B in 25min; 100% A in 15min, maintained for 5min. Flow rate was 0.8mL/min. Injection volume was 10  $\mu$ l.

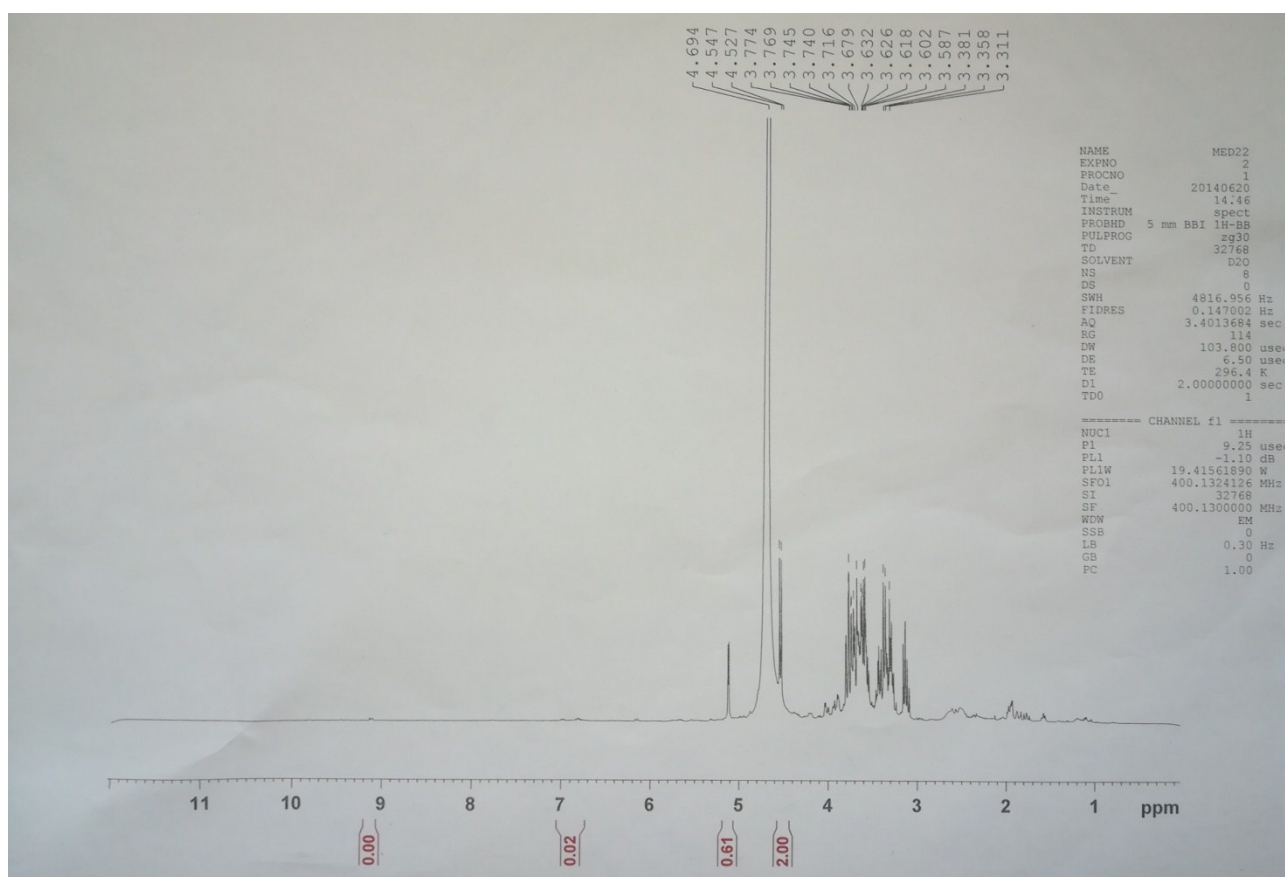

**Fig. S2.**  $^1\text{H}$ -NMR spectrum of lyophilized sugars and minerals fraction. The spectrum was recorded on a Bruker AvanceTM 400 spectrometer at 400.13 MHz. All samples, previously dried, were dissolved in deuterium oxide. Chemical shifts ( $\delta$ ) are given as parts per million relative to the residual solvent peak.

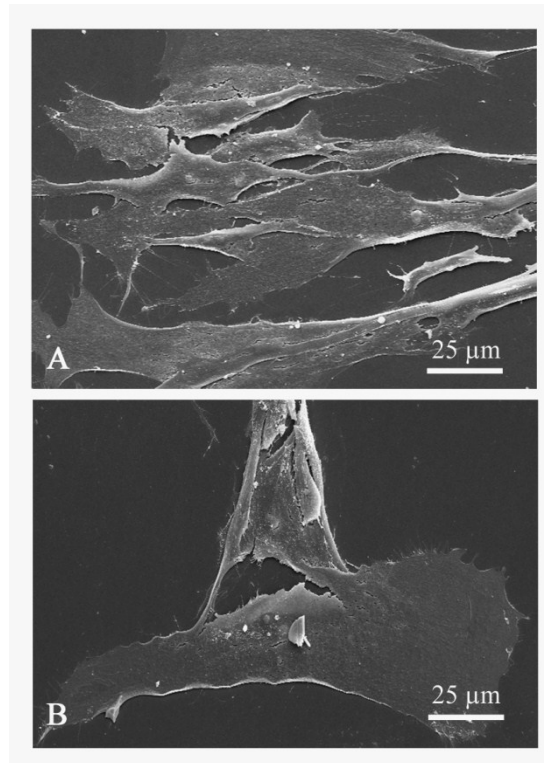

**Fig. S3.** SEM micrographs of MRC-5 cells. A) treated with 0.5 % w/w of lyophilized SMEF; B) treated with 1% w/w of lyophilized SMEF.

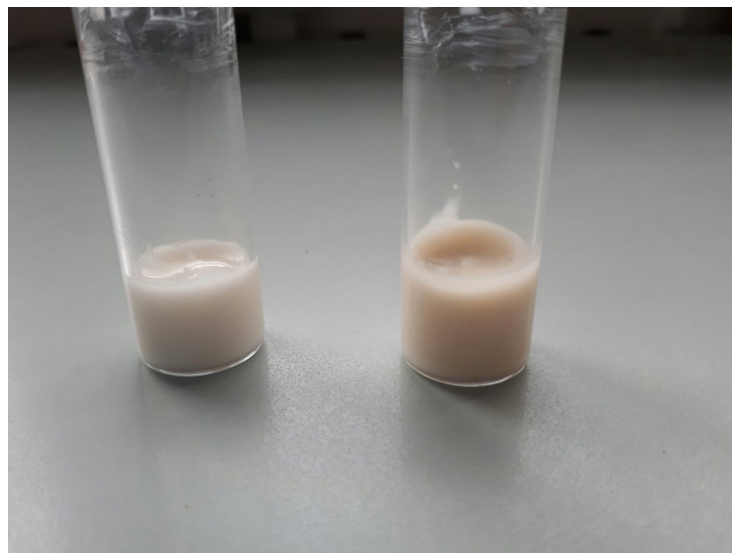

**Fig. S4.** Picture of emulsion containing lyophilized sugars and minerals enriched fraction (1% w/w) stored at  $25^{\circ}\text{C} \pm 2^{\circ}\text{C}$  with  $60 \pm 5\%$  relative humidity (R.H.) for 12 months (left) and at  $40^{\circ}\text{C} \pm 2^{\circ}\text{C}$  with  $60 \pm 5\%$  R.H. for 6 months (right) at light.

**Table S1** Metals content of emulsion containing lyophilized SMEF (1% w/w) determined by ICP-MS in our experimental model, represented in comparison with limit content provided by some countries (Italy, Germany, Canada).

| Metal                 | mg/kg       | Limits as impurities in cosmetics<br>(mg/kg) |                         |                        |
|-----------------------|-------------|----------------------------------------------|-------------------------|------------------------|
|                       |             | Italy <sup>(32)</sup>                        | Germany <sup>(31)</sup> | Canada <sup>(33)</sup> |
| As                    | < 0.05      | 1                                            | 5                       | 3                      |
| Cd                    | < 0.05      | 5                                            | 5                       | 3                      |
| Hg                    | < 0.05      | 1                                            | 1                       | 3                      |
| Pb                    | 0.72 ± 0.01 | 20                                           | 20                      | 10                     |
| Sb                    | < 0.05      | 10                                           | 10                      | 5                      |
| Cr                    | 0.51 ± 0.02 | 1                                            | -                       | -                      |
| Co                    | < 0.05      | 5                                            | -                       | -                      |
| Ni                    | 0.50 ± 0.01 | 10                                           | -                       | -                      |
| Al                    | 6.11 ± 0.11 | -                                            | -                       | -                      |
| Cu                    | 0.21 ± 0.01 | -                                            | -                       | -                      |
| Zn                    | 5.95 ± 0.21 | -                                            | -                       | -                      |
| Fe                    | 2.62 ± 0.05 | -                                            | -                       | -                      |
| Mn                    | 0.52 ± 0.01 | -                                            | -                       | -                      |
| Sn                    | 0.14 ± 0.01 | -                                            | -                       | -                      |
| Mo, Tl, Be, Ag, Bi, V | < 0.05      | -                                            | -                       | -                      |

Values are the mean ± SD of three experiments in triplicate.

<sup>31</sup> BfR, Bundesinstitut für Risikobewertung. Kosmetische Mittel: BfR empfiehlt Schwermetallgehalte über Reinheitsanforderungen der Ausgangsstoffe zu regeln, Stellungnahme Nr. 025/2006 des BfR vom 05. April 2006. Available at: <[http://www.bfr.bund.de/cm/343/kosmetische\\_mittel\\_bfr\\_empfiehl\\_schwermetallgehalte\\_ueber.pdf](http://www.bfr.bund.de/cm/343/kosmetische_mittel_bfr_empfiehl_schwermetallgehalte_ueber.pdf)>.

<sup>32</sup> B. Bocca, A. Pino, A. Alimonti and G. Forte, Toxic metals contained in cosmetics: A status report, *Regul. Toxicol. Pharmacol.*, 2014, **68**, 447-467.

<sup>33</sup> HC-SC, Health Canada-Santé Canada, 2012. Guidance on Heavy Metal Impurities in Cosmetics. Available at: <[http://www.hc-sc.gc.ca/cps-spc/pubs/indust/heavy\\_metals-metaux\\_lourds/index-eng.php](http://www.hc-sc.gc.ca/cps-spc/pubs/indust/heavy_metals-metaux_lourds/index-eng.php)>.
